# Supplementary material for: Maternal smoking during pregnancy is associated with mitochondrial DNA methylation
Source: PubMed Central journal article supplement — Environ Epigenet. 2016 Oct 20;2(3):dvw020. doi: 10.1093/eep/dvw020 (PMC5624552; doi:10.1093/eep/dvw020), 2016-10-20
Supplement: NIHMS857621-supplement-Supplemental_Materials.pdf [file NIHMS857621-supplement-Supplemental_Materials.pdf]

S1

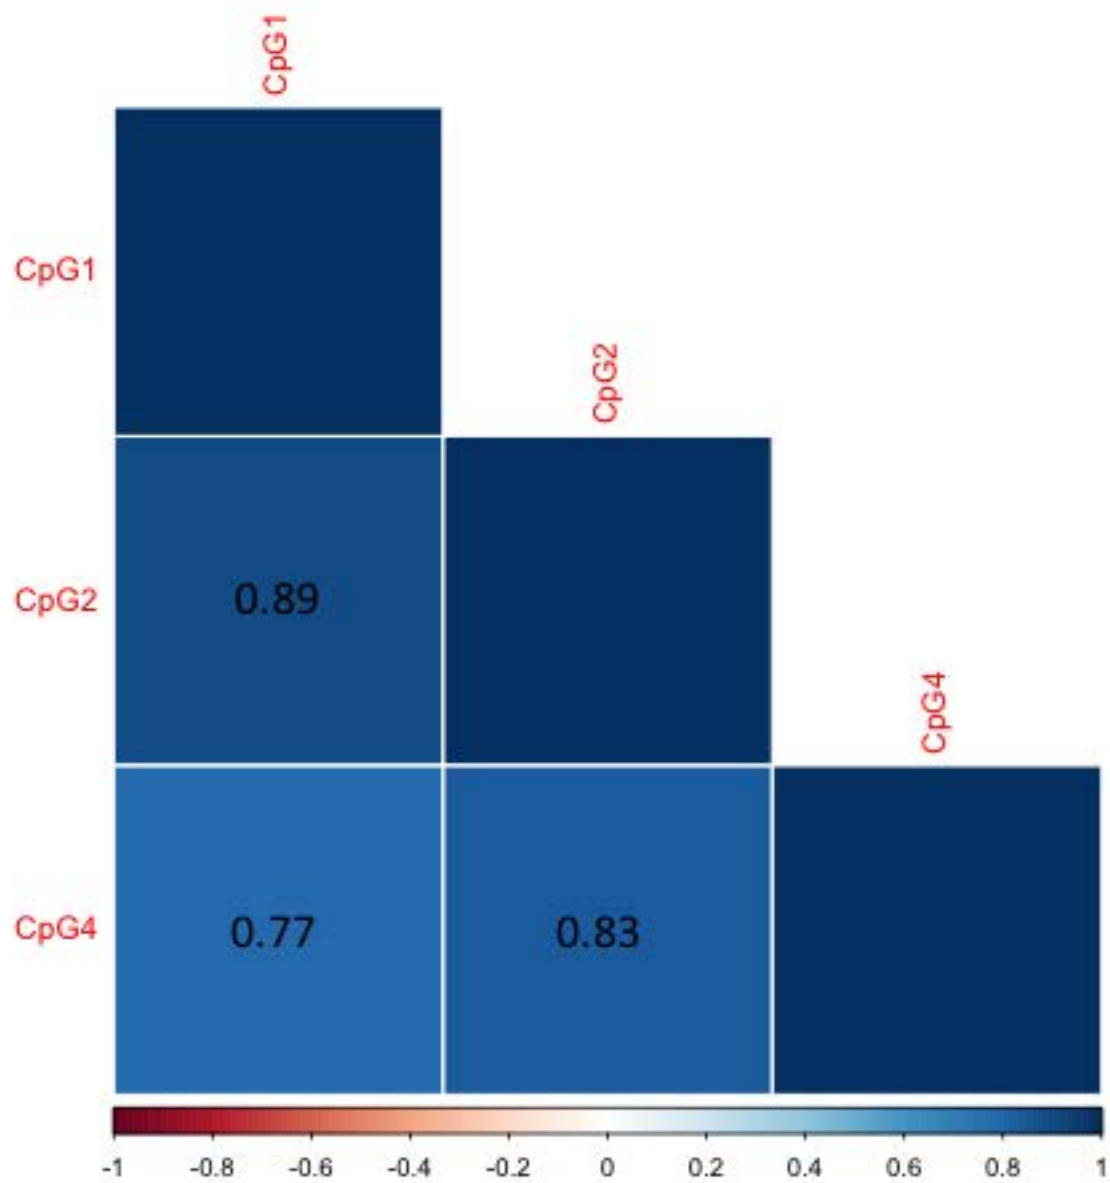

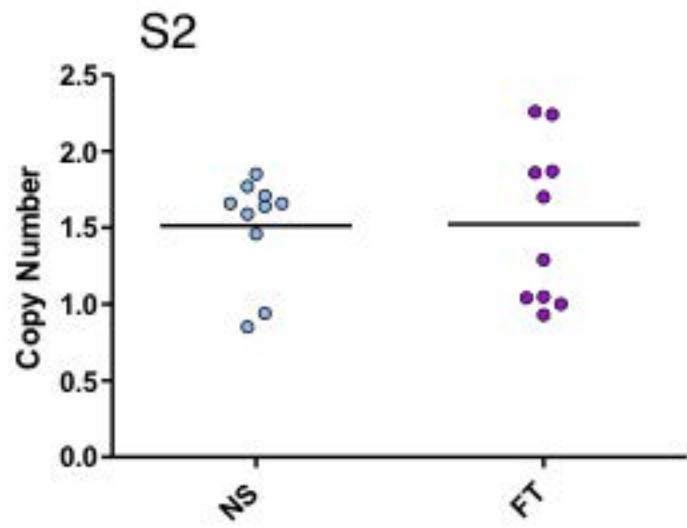

Supplemental Table 1. PCR and Pyrosequencing Information

| Primer                      | Sequence                           | Amplicon Size (bp) | Annealing Temp (C) | CpGs in Assay |
|-----------------------------|------------------------------------|--------------------|--------------------|---------------|
| L-D-Loop Region 1 For       | 5'-GGGAGTTTTTTATGTATTTGGTATT-3'    | 310                | 53                 | 3             |
| L-D-Loop Region 1 Rev (Bio) | 5'-AATATATTTAAATACTATAACCAAAAAC-3' |                    |                    |               |
| L-D-Loop Region 1 Seq       | 5'-AGTTTTTTATGTATTTGGTATTTT-3'     |                    |                    |               |
| L-D-Loop Region 2 For       | 5'-GTGTATTGTTTTGAGGAGGTAAGTT-3'    | 109                | 58                 | 2             |
| L-D-Loop Region 2 Rev (Bio) | 5'-CCATCCTACCCAACACAC-3'           |                    |                    |               |
| L-D-Loop Region 2 Seq       | 5'-TTTTTGGGGTTTGGT-3'              |                    |                    |               |
| LINE-1 Forward              | 5'- TTTTGAGTTAGGTGTGGGATATA-3'     | 150                | 52.5               | 4             |
| LINE-1 Reverse (Bio)        | 5'- AAAATCAAAAATTCCTTTC-3'         |                    |                    |               |
| LINE-1 Seq Primer           | 5'- AGTTAGGTGTGGGATATAGT-3'        |                    |                    |               |
